# Supplementary material for: Development and first evaluation of a novel multiplex real-time PCR on whole blood samples for rapid pathogen identification in critically ill patients with sepsis
Source: Springer Nature journal article supplement (doi:10.1007/s10096-018-3255-1), 2018-04-26
Supplement: MOESM1 [file 15719404]

## SUPPLEMENTAL DIGITAL CONTENT

### **Development and first evaluation of a novel multiplex real-time PCR on whole blood samples for rapid pathogen identification in critically ill patients with sepsis**

Kirsten van de Groep<sup>1,2\*#</sup>, Martine P. Bos<sup>3\*</sup>, Paul H.M. Savelkoul<sup>3-5</sup>, Anna Rubenjan<sup>3</sup>, Christel Gazenbeek<sup>3</sup>, Willem J.G. Melchers<sup>6</sup>, Tom van der Poll<sup>7,8</sup>, Nicole P. Juffermans<sup>9</sup>, David S.Y. Ong<sup>2,10</sup>, Marc J.M. Bonten<sup>1,10</sup>, Olaf L. Cremer<sup>2</sup>, *on behalf of the MARS consortium*

<sup>1</sup>Department of Epidemiology, Julius Center for Health Sciences and Primary Care, University Medical Center

Utrecht, Utrecht University, the Netherlands. <sup>2</sup>Department of Intensive Care Medicine, University Medical

Center Utrecht, Utrecht University, the Netherlands. <sup>3</sup>Microbiome, Amsterdam, the Netherlands. <sup>4</sup>Department

of Medical Microbiology & Infection Control, VU University Medical Center, Amsterdam, the Netherlands.

<sup>5</sup>Department of Medical Microbiology, Maastricht University Medical Center, Maastricht, the Netherlands.

<sup>6</sup>Department of Medical Microbiology, Radboud University Medical Center, Nijmegen, the Netherlands. <sup>7</sup>Center of Experimental and Molecular Medicine, Academic Medical Center, University of Amsterdam, the Netherlands.

<sup>8</sup>Division of Infectious Diseases, Academic Medical Center, University of Amsterdam, the Netherlands.

<sup>9</sup>Department of Intensive Care, Academic Medical Center, University of Amsterdam, the Netherlands.

<sup>10</sup>Department of Medical Microbiology, University Medical Center Utrecht, Utrecht University, the Netherlands.

\*KvdG and MPB contributed equally to this work

#Corresponding author: Kirsten van de Groep, MD. Email: [k.vandegroep-3@umcutrecht.nl](mailto:k.vandegroep-3@umcutrecht.nl)

Mailing address: Room F06.149, P.O. Box 85500, 3508 GA Utrecht, The Netherlands.

Telephone: +31 88 756 1124

**Appendix I.** Table S1. Strains used to evaluate coverage and specificity of the monoplex PCR assays

**Appendix II.** Table S2. Apparent detection rates of BSI-PCR for common blood culture contaminants

**Appendix III.** Table S3. Concordance between discordant positive BCI-PCR results and various (other) specimens sampled within a three-day time window from the index blood culture

**Appendix IV.** Figure S1. Ct-values of true positive BSI-PCR results and Time-to-positivity of paired blood cultures ( $n=106$ )

## APPENDIX I

**Table S1. Strains used to evaluate coverage and specificity of the monoplex PCR assays**

| Species                                 | Strain name / Source <sup>a</sup> |
|-----------------------------------------|-----------------------------------|
| <i>Acinetobacter baumannii</i>          | ATCC 19606                        |
| <i>Acinetobacter baumannii</i>          | RUH 875/LMG 10543                 |
| <i>Acinetobacter baumannii</i>          | RUH 134/ LMG 10541                |
| <i>Acinetobacter baumannii</i>          | LUH 5875/ LMG 25784               |
| <i>Acinetobacter baumannii</i>          | clinical isolates (5)             |
| <i>Acinetobacter calcoaceticus</i>      | ATCC 23055                        |
| <i>Acinetobacter genomospecies 13TU</i> | ATCC 17903                        |
| <i>Acinetobacter genomospecies 3</i>    | ATCC 19004                        |
| <i>Acinetobacter haemolyticus</i>       | ATCC 17906                        |
| <i>Acinetobacter johnsonii</i>          | ATCC 17909                        |
| <i>Acinetobacter junii</i>              | ATCC 17908                        |
| <i>Acinetobacter lwoffii</i>            | ATCC 15309                        |
| <i>Actinomyces spp</i>                  | clinical isolate (1)              |
| <i>Aerococcus viridans</i>              | clinical isolate (1)              |
| <i>Aspergillus candida</i>              | clinical isolate (1)              |
| <i>Aspergillus clavatus</i>             | clinical isolate (1)              |
| <i>Aspergillus flavus</i>               | clinical isolate (1)              |
| <i>Aspergillus fumigatus</i>            | clinical isolate (1)              |
| <i>Aspergillus nidulans</i>             | clinical isolate (1)              |
| <i>Aspergillus niger</i>                | clinical isolate (1)              |
| <i>Aspergillus terreus</i>              | clinical isolate (1)              |
| <i>Bacillus cereus</i>                  | DSM4313                           |
| <i>Bacteroides fragilis</i>             | ATCC 25282                        |
| <i>Candida albicans</i>                 | ATCC 90029                        |
| <i>Candida albicans</i>                 | ATCC 90030                        |
| <i>Candida albicans</i>                 | ATCC 90028                        |
| <i>Candida albicans</i>                 | clinical isolate (1)              |
| <i>Candida glabrata</i>                 | ATCC 15545                        |
| <i>Candida krusei</i>                   | ATCC 6258                         |
| <i>Candida krusei</i>                   | clinical isolate (1)              |
| <i>Candida parapsilosis</i>             | ATCC 90018                        |
| <i>Candida parapsilosis</i>             | ATCC 22019                        |
| <i>Candida tropicalis</i>               | clinical isolates (2)             |
| <i>Citrobacter freundii</i>             | ATCC 8090                         |
| <i>Citrobacter freundii</i>             | clinical isolate (1)              |
| <i>Citrobacter koseri</i>               | ATCC 27028                        |
| <i>Clostridium bif fermentans</i>       | ATCC 638                          |
| <i>Corynebacterium xerosis</i>          | ATCC 373                          |
| <i>Cronobacter sakazakii</i>            | clinical isolate (1)              |
| <i>Eikenella corrodens</i>              | DSM 8340                          |
| <i>Enterobacter aerogenes</i>           | ATCC 13048                        |
| <i>Enterobacter aerogenes</i>           | clinical isolate (1)              |
| <i>Enterobacter cloacae</i>             | ATCC 23373                        |
| <i>Enterobacter cloacae</i>             | ATCC 13047                        |
| <i>Enterobacter cloacae</i>             | clinical isolate (1)              |
| <i>Enterococcus avium</i>               | clinical isolate (1)              |

**APPENDIX I. (continuation)**

| <b>Species</b>                   | <b>Source / Strain name <sup>a</sup></b> |
|----------------------------------|------------------------------------------|
| <i>Enterococcus durans</i>       | clinical isolate (1)                     |
| <i>Enterococcus faecalis</i>     | CDC NY 3                                 |
| <i>Enterococcus faecalis</i>     | ATCC 29212                               |
| <i>Enterococcus faecalis</i>     | CDC NY 5                                 |
| <i>Enterococcus faecalis</i>     | clinical isolates (14)                   |
| <i>Enterococcus faecium</i>      | ATCC 35667                               |
| <i>Enterococcus faecium</i>      | CDC NY2                                  |
| <i>Enterococcus faecium</i>      | clinical isolates (12)                   |
| <i>Enterococcus gallinarum</i>   | CDC NY4                                  |
| <i>Escherichia coli</i>          | ATCC 25922                               |
| <i>Escherichia coli</i>          | ATCC 35218                               |
| <i>Escherichia coli</i>          | ATCC 35323                               |
| <i>Escherichia coli</i>          | ATCC 35150                               |
| <i>Escherichia coli</i>          | ATCC 11775T                              |
| <i>Escherichia coli</i>          | clinical isolates (11)                   |
| <i>Escherichia coli (CTXM-1)</i> | clinical isolates (2)                    |
| <i>Escherichia coli (CTXM-9)</i> | clinical isolates (3)                    |
| <i>Escherichia vulneris</i>      | DSM 4564                                 |
| <i>Haemophilus influenza</i>     | ATCC 49247                               |
| <i>Klebsiella oxytoca</i>        | ATCC 13182                               |
| <i>Klebsiella oxytoca</i>        | DSM 7342                                 |
| <i>Klebsiella oxytoca</i>        | clinical isolates (5)                    |
| <i>Klebsiella planticola</i>     | ATCC 33531                               |
| <i>Klebsiella pneumoniae</i>     | ATCC BAA-1705                            |
| <i>Klebsiella pneumoniae</i>     | ATCC 13884                               |
| <i>Klebsiella pneumoniae</i>     | ATCC 13887                               |
| <i>Klebsiella pneumoniae</i>     | ATCC 13883                               |
| <i>Klebsiella pneumoniae</i>     | clinical isolates (7)                    |
| <i>Klebsiella terrigena</i>      | ATCC 33257                               |
| <i>Lactobacillus acidophilus</i> | DSM 20079                                |
| <i>Lactococcus lactis</i>        | DSM 20481                                |
| <i>Listeria monocytogenes</i>    | ATCC 15313                               |
| <i>Moraxella catarrhalis</i>     | clinical isolate (1)                     |
| <i>Morganella morganii</i>       | clinical isolate (1)                     |
| <i>Neisseria meningitidis</i>    | clinical isolate (1)                     |
| <i>Propionibacterium acnes</i>   | DSM 16379                                |
| <i>Proteus mirabilis</i>         | ATCC 29906                               |
| <i>Pseudomonas aeruginosa</i>    | ATCC 27853                               |
| <i>Pseudomonas aeruginosa</i>    | ATCC 10145T                              |
| <i>Pseudomonas aeruginosa</i>    | clinical isolates (11)                   |
| <i>Pseudomonas fluorescens</i>   | ATCC 13525                               |
| <i>Pseudomonas putida</i>        | ATCC 12633                               |
| <i>Salmonella enteritidis</i>    | ATCC 13076T                              |
| <i>Salmonella enteritidis</i>    | clinical isolate (1)                     |
| <i>Salmonella typhimurium</i>    | ATCC 14028                               |
| <i>Salmonella typhimurium</i>    | clinical isolate (1)                     |
| <i>Serratia marcescens</i>       | ATCC 13880                               |

## APPENDIX I. (continuation)

| Species                               | Source / Strain name <sup>a</sup> |
|---------------------------------------|-----------------------------------|
| <i>Serratia marcescens</i>            | DSM12481                          |
| <i>Serratia marcescens</i>            | DSM17174                          |
| <i>Serratia marcescens</i>            | clinical isolate (1)              |
| <i>Shigella flexneri</i>              | ATCC 12022                        |
| <i>Staphylococcus aureus</i>          | ATCC 25923                        |
| <i>Staphylococcus aureus</i>          | ATCC 29213                        |
| <i>Staphylococcus aureus</i>          | ATCC 43300                        |
| <i>Staphylococcus aureus</i>          | NCTC8325                          |
| <i>Staphylococcus aureus</i>          | ATCC 12600T                       |
| <i>Staphylococcus aureus</i>          | Newman                            |
| <i>Staphylococcus aureus</i>          | clinical isolates (7)             |
| <i>Staphylococcus aureus</i>          | clinical isolates MRSA (3)        |
| <i>Staphylococcus capitis</i>         | LMD 89175                         |
| <i>Staphylococcus capitis</i>         | clinical isolate (1)              |
| <i>Staphylococcus chromogenus</i>     | ATCC 43764                        |
| <i>Staphylococcus epidermidis</i>     | ATCC 14990T                       |
| <i>Staphylococcus epidermidis</i>     | ATCC 12228                        |
| <i>Staphylococcus epidermidis</i>     | clinical isolates (2)             |
| <i>Staphylococcus haemolyticus</i>    | clinical isolates (2)             |
| <i>Staphylococcus hominis</i>         | clinical isolates (2)             |
| <i>Staphylococcus hyicus</i>          | NCTC 10350T                       |
| <i>Staphylococcus hyicus</i>          | clinical isolate (1)              |
| <i>Staphylococcus saprophyticus</i>   | clinical isolates (3)             |
| <i>Staphylococcus warneri</i>         | clinical isolate (1)              |
| <i>Staphylococcus lugdunensis</i>     | clinical isolate (1)              |
| <i>Stenotrophomonas maltophilia</i>   | ATCC 13637                        |
| <i>Stenotrophomonas maltophilia</i>   | clinical isolate (1)              |
| <i>Streptococcus agalactiae</i>       | ATCC 13813                        |
| <i>Streptococcus agalactiae</i>       | clinical isolates (3)             |
| <i>Streptococcus mitis</i>            | ATCC 49456                        |
| <i>Streptococcus mitis</i>            | clinical isolate (1)              |
| <i>Streptococcus oralis</i>           | ATCC 35037                        |
| <i>Streptococcus parasanguinis</i>    | ATCC 15912                        |
| <i>Streptococcus pneumoniae</i>       | TIGR4                             |
| <i>Streptococcus pneumoniae</i>       | ATCC 49619                        |
| <i>Streptococcus pneumoniae</i>       | ATCC 6305                         |
| <i>Streptococcus pneumoniae</i>       | D39                               |
| <i>Streptococcus pseudopneumoniae</i> | ATCC BAA-960                      |
| <i>Streptococcus pyogenes</i>         | ATCC 19615                        |
| <i>Streptococcus sanguinis</i>        | ATCC 10556                        |
| <i>Veillonella parvula</i>            | ATCC 10790                        |
| <i>Yersinia enterocolitica</i>        | ATCC 23715                        |
| <i>Yersinia enterocolitica</i>        | clinical isolates (2)             |

<sup>a</sup> Clinical isolates were retrieved from the department of Medical Microbiology and Infection Prevention, VU Medical Center, (Amsterdam, the Netherlands) except for the *Aspergillus* and *Candida* isolates which were retrieved from the department of Medical Microbiology, Radboud University Nijmegen Medical Centre, (Nijmegen, the Netherlands). The number of different clinical isolates evaluated is given in brackets.

## APPENDIX II.

**Table S2. Apparent detection rates of BSI-PCR for common blood culture contaminants**

| Pathogen                               | Primary analysis<br>(n=159) <sup>a</sup> |                  | Secondary analysis<br>(n=89) <sup>b</sup> |                  |
|----------------------------------------|------------------------------------------|------------------|-------------------------------------------|------------------|
|                                        | Blood culture positive                   | BSI-PCR positive | Blood culture positive                    | BSI-PCR positive |
| <i>E. faecium</i>                      | 50                                       | 33 (66)          | 36                                        | 23 (64)          |
| <i>E. faecalis</i>                     | 27                                       | 20 (74)          | 14                                        | 11 (79)          |
| Coagulase negative Staphylococci (CNS) | 50                                       | 22 (44)          | 25                                        | 13 (52)          |
| Other Gram-positive <sup>c</sup>       | 32                                       | 3 (2)            | 14                                        | 0                |

Results are presented as frequencies (row percentages).

<sup>a</sup> Pathogens were classified as possible contaminant and excluded if  $\geq 1$  of the following criteria was fulfilled:

- Poly-microbial results from corresponding blood culture with Enterococci and CNS
- Negative blood culture or blood culture with different pathogen on same day

<sup>b</sup> Pathogens were classified as possible contaminant and excluded if  $\geq 1$  of the additional criteria was fulfilled:

- Poly-microbial results from corresponding BC with other Gram-positive pathogens ( $n=8$ )
- Negative BC within next two days ( $n=54$ )
- Sample was not drawn under a therapeutic antimicrobial course and no initiation of therapeutic antimicrobial in next two days ( $n=18$ )

<sup>c</sup> Excluding *S. aureus* and *S. pneumoniae*.

## APPENDIX III.

**Table S3. Concordance between discordant positive BCI-PCR results and various (other) specimens sampled within a three-day time window from the index blood culture**

| Discordant-positive PCR result (n) | Specimen or site           |                |                |                |                                  |                                  |
|------------------------------------|----------------------------|----------------|----------------|----------------|----------------------------------|----------------------------------|
|                                    | Blood <sup>a</sup> (n=103) | Sputum (n=118) | Throat (n=123) | Rectum (n=125) | Body-surface <sup>b</sup> (n=78) | Deep/Sterile <sup>c</sup> (n=70) |
| <i>E. faecalis</i> (23)            | 2                          | 0              | 0              | 0              | 1                                | 7                                |
| <i>E. faecium</i> (19)             | 6                          | 0              | 0              | 0              | 1                                | 7                                |
| <i>S. aureus</i> (30)              | 1                          | 4              | 4              | 4              | 6                                | 3                                |
| <i>S. pneumoniae</i> (5)           | 0                          | 0              | 0              | 0              | 0                                | 0                                |
| <i>A. baumannii</i> (4)            | 1                          | 1              | 0              | 0              | 0                                | 0                                |
| <i>E. coli</i> (34)                | 0                          | 2              | 5              | 11             | 1                                | 2                                |
| <i>P. aeruginosa</i> (18)          | 0                          | 1              | 1              | 1              | 0                                | 0                                |
| <i>Enterococcus</i> genus (13)     | 4                          | 0              | 0              | 0              | 1                                | 6                                |
| <i>Staphylococcus</i> genus (17)   | 5                          | 0              | 1              | 0              | 4                                | 1                                |
| Gram-positive (8)                  | 4                          | 0              | 0              | 0              | 4                                | 3                                |
| Gram-negative (7)                  | 0                          | 2              | 1              | 3              | 0                                | 0                                |
| 3 <i>Candida</i> (1)               | 0                          | 0              | 0              | 0              | 0                                | 0                                |
| Pan- <i>Aspergillus</i> (2)        | 0                          | 0              | 0              | 0              | 0                                | 0                                |
| <b>Total (%) (181)</b>             | <b>23 (13)</b>             | <b>10 (6)</b>  | <b>12 (7)</b>  | <b>19 (10)</b> | <b>18 (10)</b>                   | <b>29 (16)</b>                   |

Results are presented as concordance rates between 181 discordant positive BSI-PCR results (occurring among 130 blood samples used in the primary analysis) and various other specimens obtained for culture during ICU-stay within  $\pm 3$  days of the index sample. These included twice weekly surveillance samples of throat, sputum, and rectum collected as part of local SDD protocols that were in place in both study centers, as well as cultures obtained by order of the attending physician. Number of performed cultures varied for each evaluated BSI-PCR sample from 0-3 per evaluated site/specimen and one discordant positive PCR result can be in concordance with multiple sites or specimens.

<sup>a</sup> Concerns other blood cultures than the paired index blood culture. The latter was initially used to evaluate BSI-PCR result and was collected at exactly the same moment and from same catheter hub or venipuncture site as the BSI-PCR sample.

<sup>b</sup> Body-surface sites include, among others, skin or wound swabs, and catheter tip cultures.

<sup>c</sup> Deep/sterile specimens include bronchoalveolar lavage fluid, urine, ascites, drain fluid, liquor, pus, (post-mortem) tissue biopsies.

APPENDIX IV.

Figure S1. Ct-values of true positive BSI-PCR results and time-to-positivity of paired blood cultures (n=106)

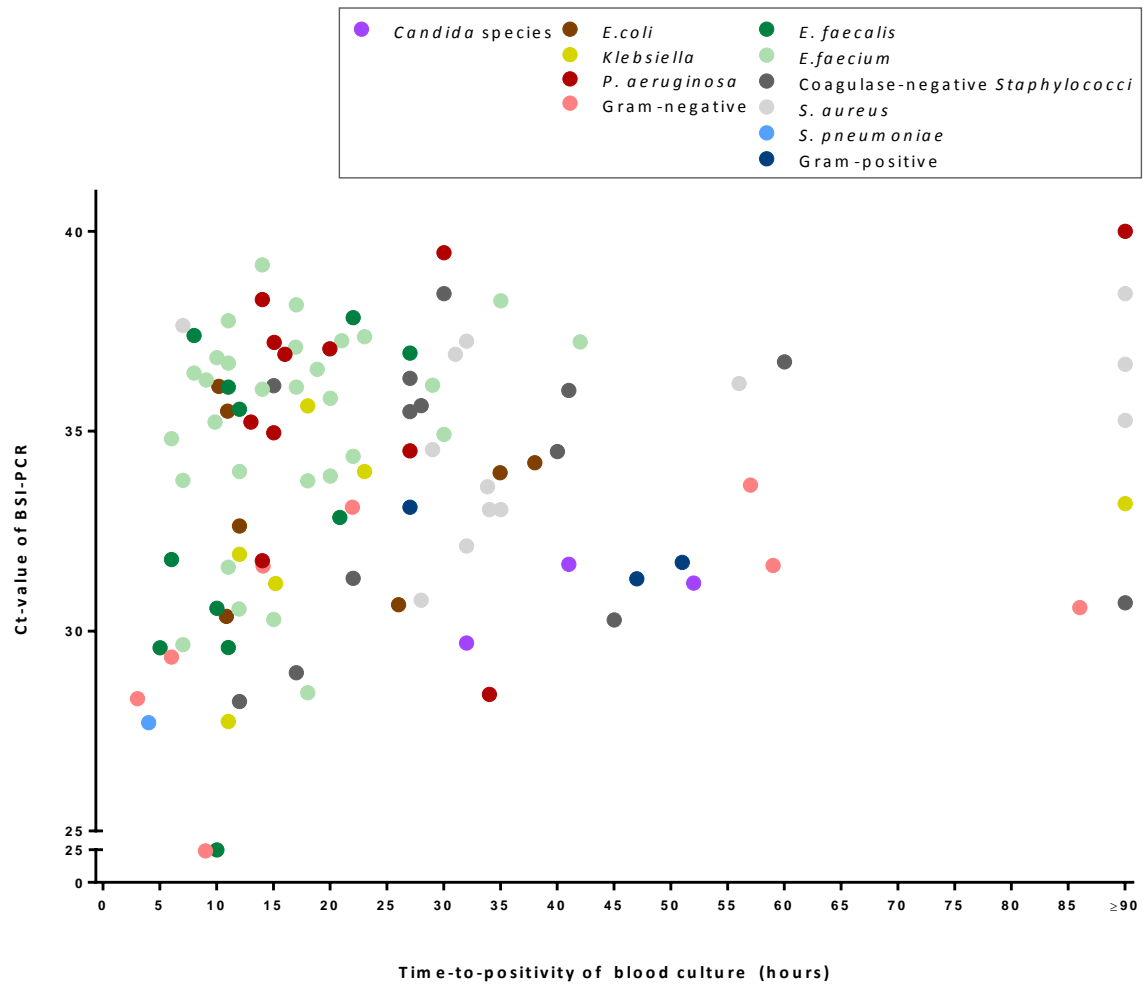

Data points show paired detections of pathogens by both blood culture and BSI-PCR, including identification of *E. faecium* (n=30), *S. aureus* (n=13), CNS (n=13), *E. faecalis* (n=11), *P. aeruginosa* (n=11), and other pathogens (n=28). There was no overall correlation between Ct-value and time-to-positivity: Spearman's rho=0.15, p=0.12.
